# Supplementary material for: Safety Pharmacological Evaluation of the Coffee Component, Caffeoylquinic Acid, and Its Metabolites, Using Ex Vivo and In Vitro Profiling Assays
Source: PubMed Central journal article supplement (PMC6789782; doi:10.3390/ph12030110), 2019-07-17
Supplement: pharmaceuticals-12-00110-s001.pdf [file pharmaceuticals-12-00110-s001.pdf]

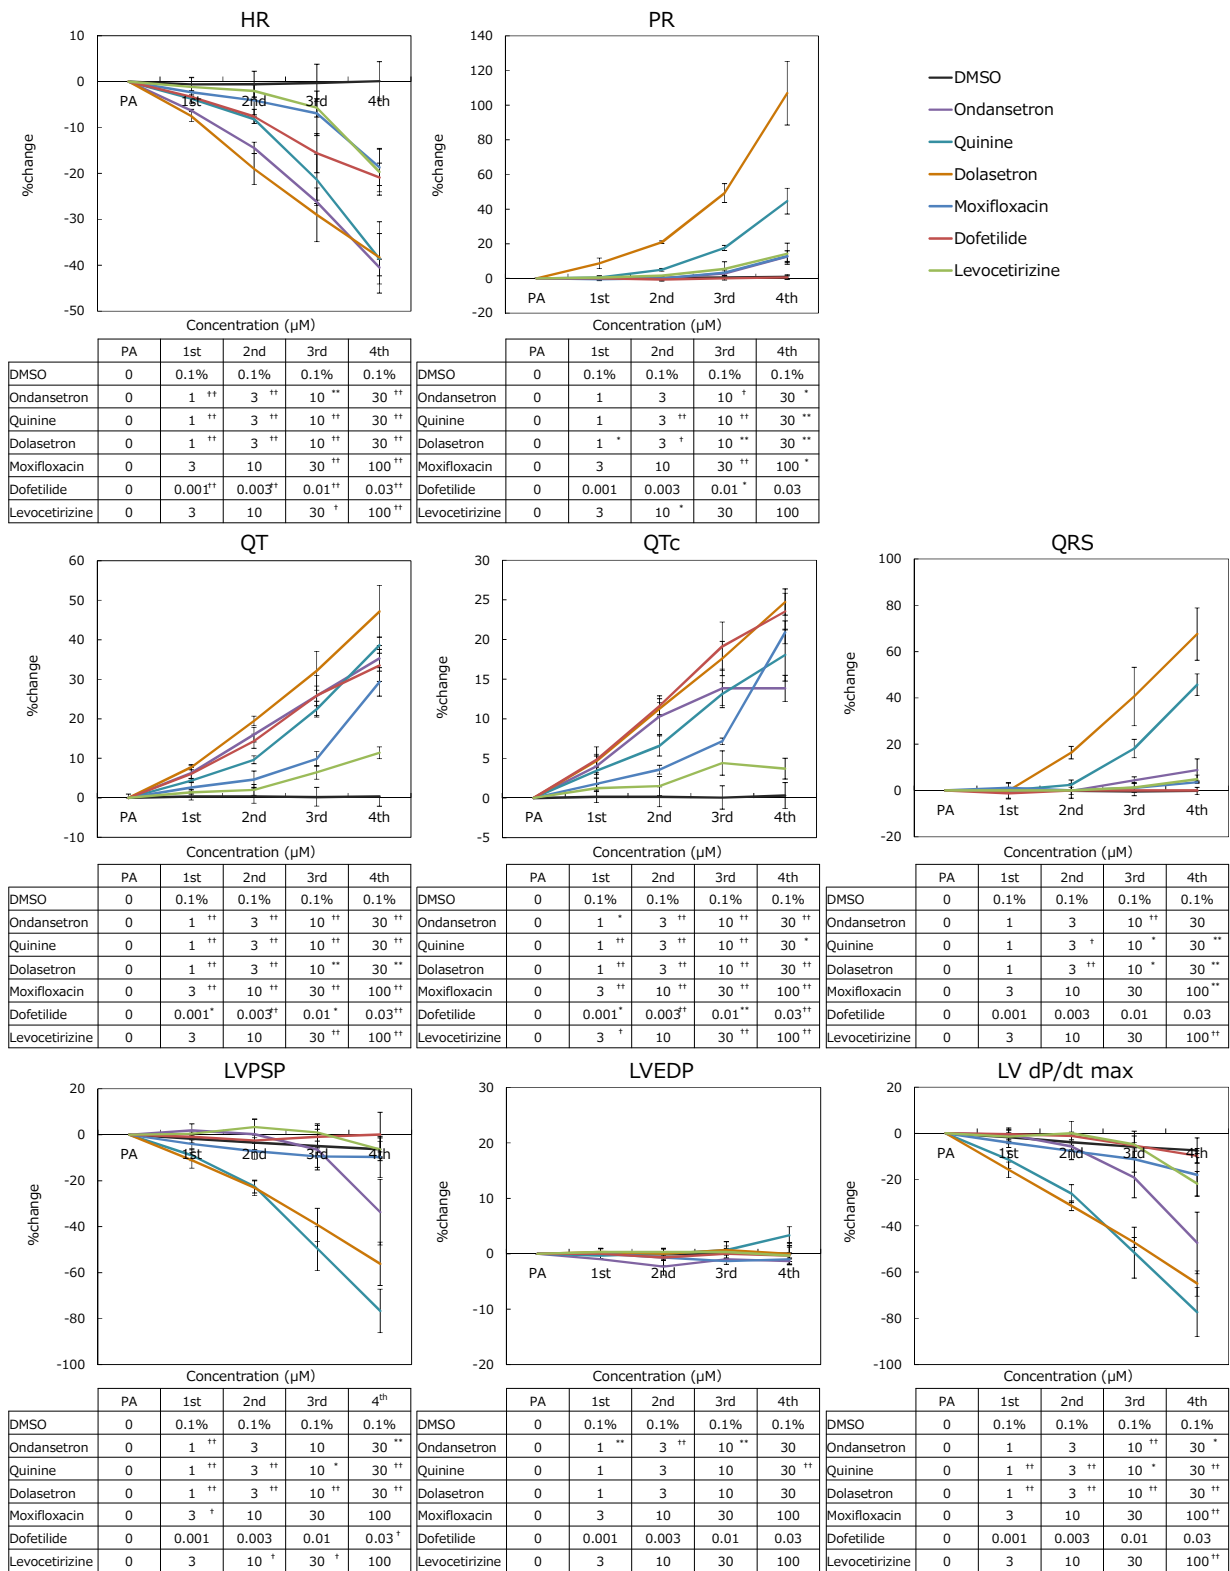

Figure S1. Comparison between drug and solvent control effects in the parameters of the Langendorff perfused heart assay. Each error bar represents mean  $\pm$  SD (DMSO: n = 39, drugs: n = 3). Drug concentrations were represented in table. \*:  $p < 0.05$ , \*\*:  $p < 0.01$ ; Significantly different from pre-application (PA) (Welch t-test). †:  $p < 0.05$ , ††:  $p < 0.01$ ; Significantly different from PA (Student's t-test).
